# Supplementary material
Source: PubMed Central journal article supplement (PMC1578255)
Supplement: rsif20040022s10.pdf [file rsif20040022s10.pdf]

# 1 Electronic appendix: Modelling of intensity distributions

The characterization of the GFP-LamA pixel intensity (density) distribution on a mesoscopic scale was carried out by assuming random lateral distributions of GFP-LamA. We assume that the lamin density variations are characterized by a single length scale,  $\xi$ . The area of the pixel can then be partitioned into  $(l_{pix}/\xi)^2$  square cells each with area  $\xi^2$ . The total intensity for a pixel is the contributions from the squares which are not devoid of GFP-LamA:  $I = \rho(l_{pix}^2 - \xi^2 n)$  where  $n$  is the number of cells devoid of GFP-LamA and  $\rho$  is proportional to the density of GFP-LamA in the squares with fluorescence contribution<sup>1</sup>. Within the simplified description the configurations of the regions are completely random and the probability distribution for  $n$  can be described by a simple binomial distribution:

$$p(n) = \binom{\left(\frac{l_{pix}}{\xi}\right)^2}{n} \phi^n (1 - \phi)^{\left(\frac{l_{pix}}{\xi}\right)^2 - n} \quad (1)$$

where  $\phi$  is the area fraction of GFP-LamA devoid regions. The mean and variance in the intensity are  $\langle I \rangle = \rho l_{pix}^2 (1 - \phi)$  and  $\sigma(I) = \rho l_{pix}^2 \left(\frac{l_{pix}}{\xi}\right) \sqrt{\phi(1 - \phi)}$ . On this basis, we predict the density distributions of three models for the lateral organization of the lamina under lateral expansion.

## 1.1 Network lateral expansion model

For expansion of a regular lamina network by a factor  $\lambda \sim \sqrt{A_{LamA}^i/A_{LamA}^o}$  where  $A_{LamA}^o$  is the initial GFP-LamA area, the density of GFP-LamA is reduced by a factor  $A_{LamA}^o/A_{LamA}^i$ . It follows that with area dilation,  $\langle I \rangle$  is reduced by  $\sim \frac{A_{LamA}^o}{A_{LamA}^i}$  while  $\sigma(I)$  is reduced by  $\sim \left(\frac{A_{LamA}^o}{A_{LamA}^i}\right)^{1.5}$ .

---

<sup>1</sup>Note that GFP-LamA is much smaller ( $\sim 50\text{nm}$ ) than both the optical resolution ( $\sim 250\text{nm}$ ) and  $l_{pix}$ , so the intensity of a pixel is the added contribution of fluorophores within a pixel.

## 1.2 Variable pore size model

Here the important length scale is the NPC diameter,  $\xi_p$ . For the unperturbed NE,  $A_p^o$  is the area initially occupied by NPCs and  $\xi_p^o \sim 40 - 120$  nm varies under lateral stretching of NE. Here, NPCs are considered as regions devoid of GFP-LamA and the area of the surrounding lamina,  $A_{LamA}$ , is a constant. The area fraction occupied by NPCs changes during expansion and it follows that an expansion of NPC area gives rise to a small decrease in  $\langle I \rangle$  while the relative width of the distribution remains constant:  $\frac{\sigma(I)}{\langle I \rangle} = \frac{l_{pix}}{\xi_p^o} \sqrt{\frac{A_p^o}{A_{LamA}}}$ .

## 1.3 Lamin vacancy model

For simplicity we assume that the characteristic length scale,  $\xi$ , for the vacancies or voids that appear upon expansion is the same as for the NPCs. The area of such vacancies/voids is denoted by  $A_{vac}$ . In this case  $\langle I \rangle$  decreases like  $\frac{A_{LamA}}{A_{LamA} + A_p^o + A_{vac}}$ , and  $\frac{\sigma(I)}{\langle I \rangle} = \frac{l_{pix}}{\xi_p^o} \sqrt{\frac{A_p^o + A_{vac}}{A_{LamA}}}$ . Thus while the intensity monotonously declines,  $\sigma(I)$  changes only modestly over a wide range of  $\frac{A_p^o + A_{vac}}{A_{LamA}}$ .
